# Supplementary material for: Synthesis and Characterization of Spirocyclic Mid-Block Containing Triblock Copolymer
Source: MDPI journal article supplement (doi:10.3390/polym15071677), 2023-03-28
Supplement: s1 [file s1]

## Supplementary Material

### Synthesis and characterization of spirocyclic mid-block containing triblock copolymer

Suraj Aswale <sup>1</sup>, Minji Kim <sup>1</sup>, Dongwoo Kim<sup>1</sup>, Aruna Kumar Mohanty <sup>1</sup>, Heung Bae Jeon <sup>2</sup>, Hong Y. Cho <sup>1,\*</sup>, and Hyun-jong Paik <sup>1,\*</sup>

1 Department of Polymer Science and Engineering, Pusan National University,  
Busan 609-735, South Korea 1; hpaik@pusan.ac.kr

2 Department of Chemistry, Kwangwoon University, Seoul 139-701, South Korea 2;  
hbj@kw.ac.kr

Correspondence: [H.J.P.-hpaik@pusan.ac.kr](mailto:H.J.P.-hpaik@pusan.ac.kr); H.Y.C- [hongycho@pusan.ac.kr](mailto:hongycho@pusan.ac.kr)

#### Table of Contents

**Figure S1.** Prep SEC of spirocyclic PS.

**Figure S2.** Molecular weight of linear PS and linear triblock copolymer by SEC.

**Figure S3.**  $T_g$  of linear PS and linear triblock copolymer, spirocyclic macroinitiator, and triblock.

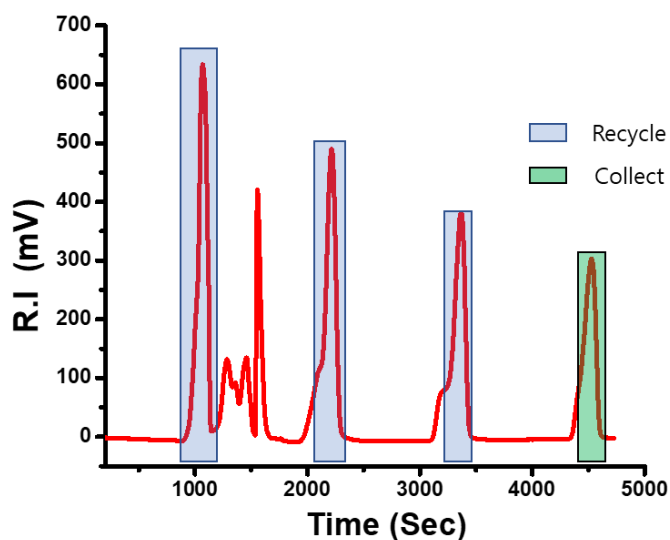

**Figure S1.** Prep SEC of spirocyclic PS.

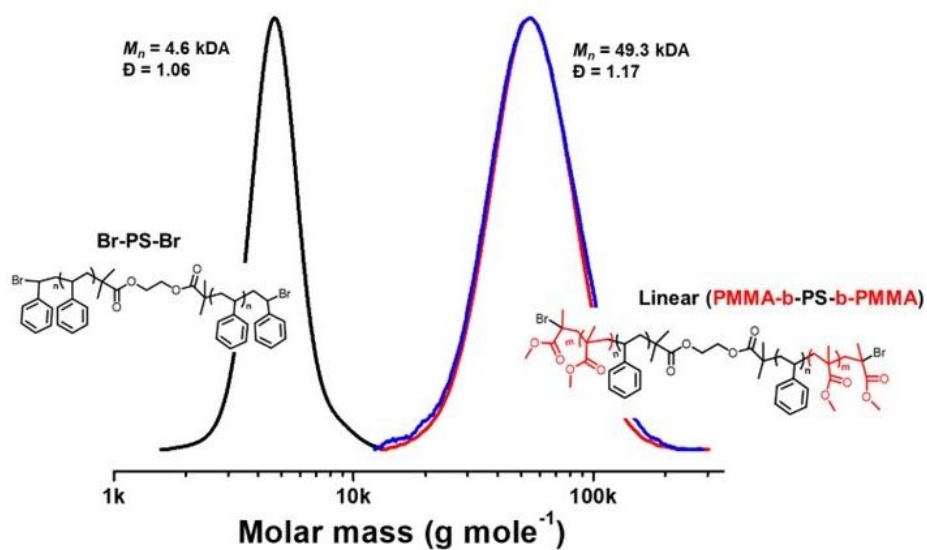

**Figure S2.** Molecular weight of linear PS (black line) and linear triblock copolymer (PMMA-b-PS-b-PMMA) (blue and red line for RI and VWD detector, respectively) by SEC.

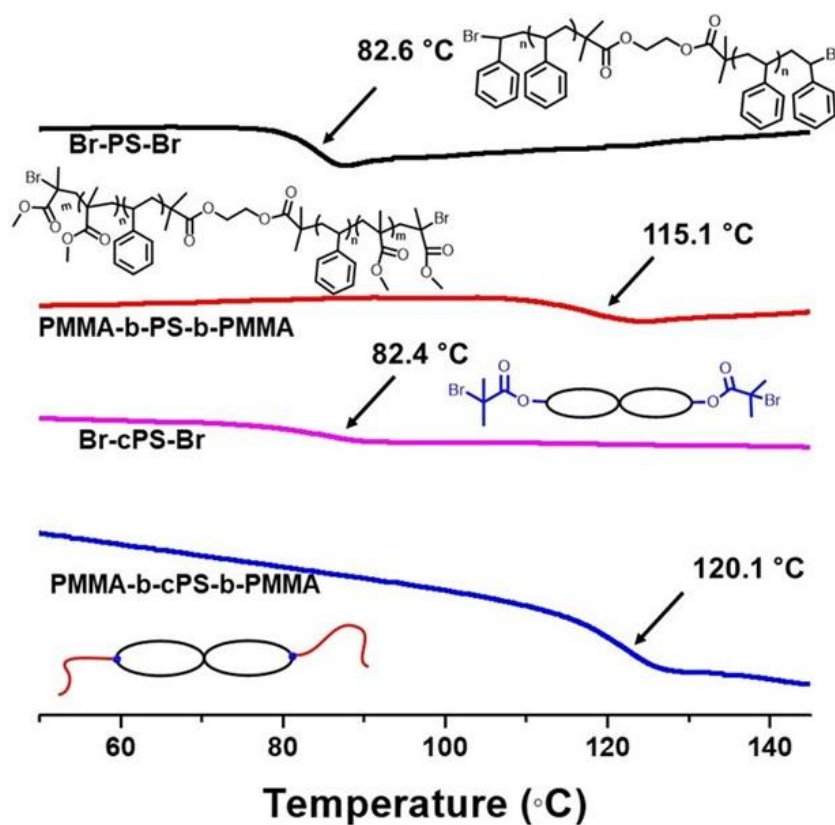

**Figure S3.**  $T_g$  of linear PS (black line) and linear triblock copolymer (PMMA-b-PS-b-PMMA) (red line), spirocyclic macroinitiator (pink line), and triblock copolymer (PMMA-b-cPS-b-PMMA) (blue line).
